# Supplementary material for: Equilibria and correlation of systems involving 1-hexyl-3-methylpyridinium trifluoromethanesulfonate
Source: Royal Society of Chemistry journal article supplement (doi:10.1039/c9ra09283h), 2019-01-01
Supplement: c9ra09283h1.pdf [file c9ra09283h1.pdf]

## **SUPPLEMENTARY MATERIAL**

### **PHASE EQUILIBRIA AND CORRELATION OF SYSTEMS INVOLVING 1-HEXYL-3-METHYLPYRIDINIUM TRIFLUOROMETHANESULFONATE**

R. Corchero<sup>1</sup>, A. Marcilla<sup>2,3</sup>, M.M. Olaya<sup>2,3</sup>, P. Carbonell-Hermida<sup>2,3</sup>, A. Soto<sup>1\*</sup>

<sup>1</sup> Cretus Institute. Department of Chemical Engineering, Universidade de Santiago de Compostela, E-15782 Santiago de Compostela, Spain

<sup>2</sup> Chemical Engineering Department, University of Alicante, 03080 Alicante, Spain

<sup>3</sup> Institute of Chemical Process Engineering, University of Alicante, 03080, Alicante, Spain

---

\* Corresponding author. E-mail address: ana.soto@usc.es

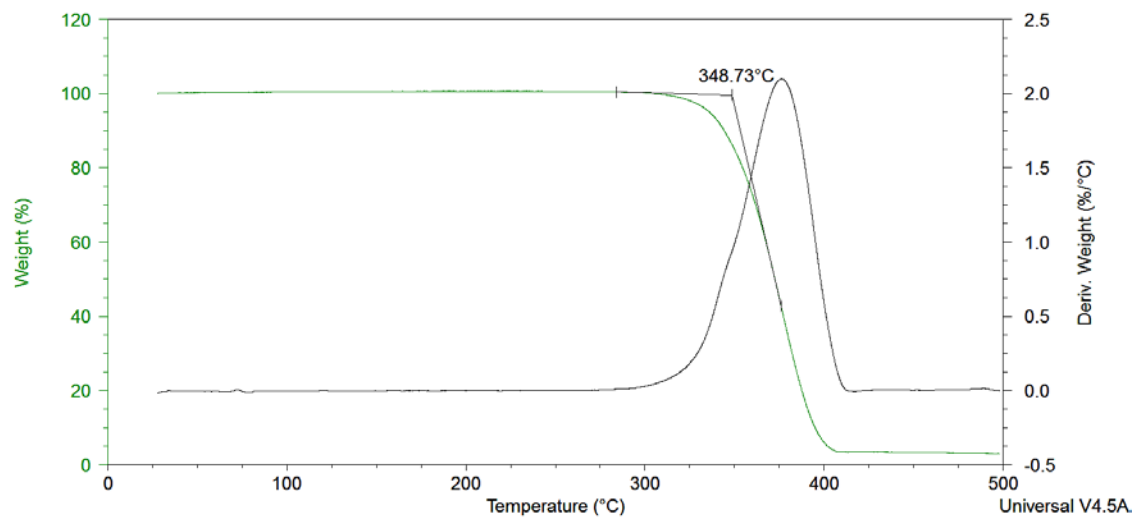

**Figure S1.**  $T_d$  calculation from TGA thermogram of [C<sub>6</sub>C<sub>1</sub>py][OTf].

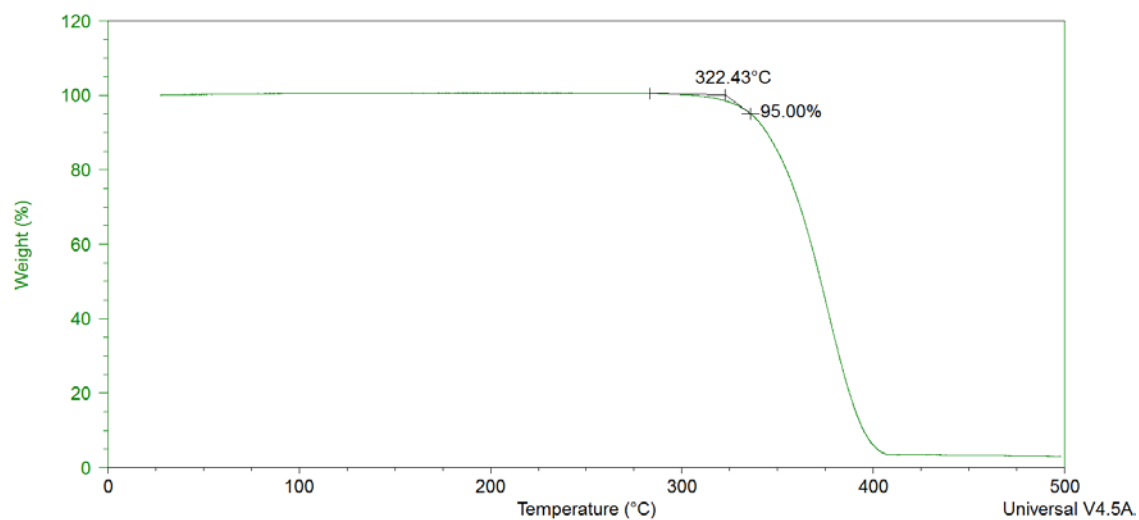

**Figure S2.**  $T_{d,5\%}$  calculation from TGA thermogram of [C<sub>6</sub>C<sub>1</sub>py][OTf].

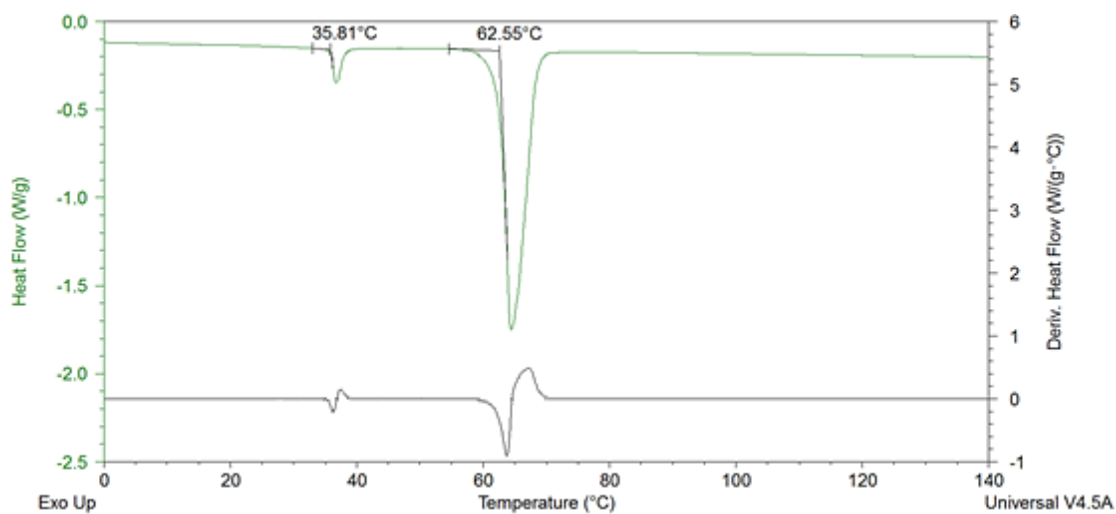

**Figure S3.** Thermal events calculation (onset) from DSC thermogram of [C<sub>6</sub>C<sub>1</sub>py][OTf].

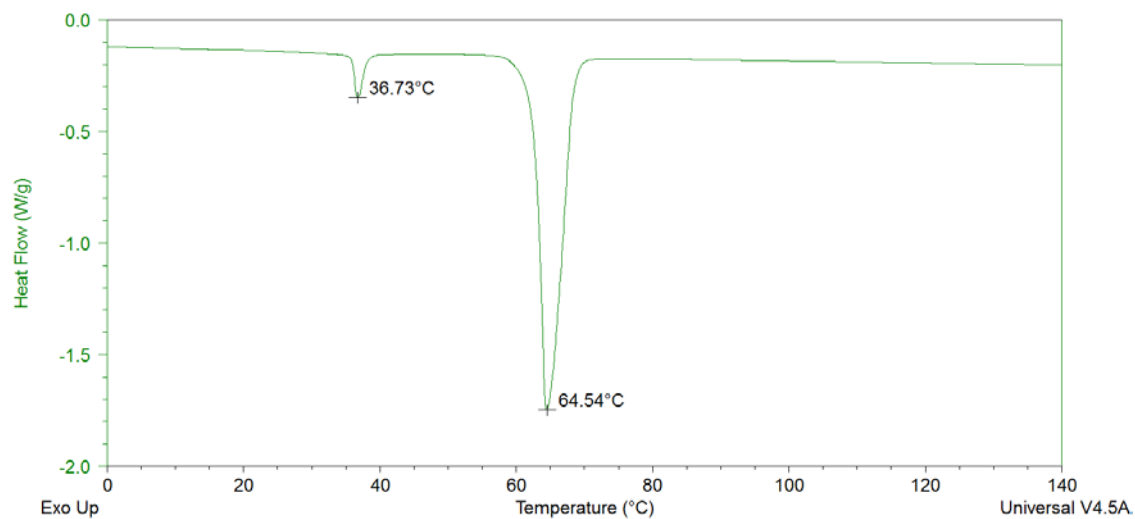

**Figure S4.** Thermal events calculation (midpoint) from DSC thermogram of [C<sub>6</sub>C<sub>1</sub>py][OTf].

Table S1. Liquid-liquid equilibrium of the ternary system water (1) + [C<sub>6</sub>C<sub>1</sub>py][OTf] (2) + *n*-octane (3) at 298.15 K and 0.1 MPa.

| Biphasic region 1 |                |                |                |                |                |                |                |                |
|-------------------|----------------|----------------|----------------|----------------|----------------|----------------|----------------|----------------|
| Upper Phase       |                |                | Lower phase    |                |                |                |                |                |
| $w_1$             | $w_2$          | $w_3$          | $w_1$          | $w_2$          | $w_3$          |                |                |                |
| 0.000             | 0.000          | 1.000          | 1.000          | 0.000          | 0.000          |                |                |                |
| 0.000             | 0.000          | 1.000          | 0.986          | 0.014          | 0.000          |                |                |                |
| $u(w_1)=0.001$    | $u(w_2)=0.001$ | $u(w_3)=0.001$ | $u(w_1)=0.003$ | $u(w_2)=0.003$ | $u(w_3)=0.001$ |                |                |                |
| Biphasic region 2 |                |                |                |                |                |                |                |                |
| Upper Phase       |                |                | Lower phase    |                |                |                |                |                |
| $w_1$             | $w_2$          | $w_3$          | $w_1$          | $w_2$          | $w_3$          |                |                |                |
| 0.972             | 0.028          | 0.000          | 0.179          | 0.821          | 0.000          |                |                |                |
| 0.972             | 0.028          | 0.000          | 0.179          | 0.821          | 0.000          |                |                |                |
| $u(w_1)=0.003$    | $u(w_2)=0.003$ | $u(w_3)=0.001$ | $u(w_1)=0.003$ | $u(w_2)=0.003$ | $u(w_3)=0.001$ |                |                |                |
| Biphasic region 3 |                |                |                |                |                |                |                |                |
| Upper Phase       |                |                | Lower phase    |                |                |                |                |                |
| $w_1$             | $w_2$          | $w_3$          | $w_1$          | $w_2$          | $w_3$          |                |                |                |
| 0.000             | 0.000          | 1.000          | 0.110          | 0.879          | 0.011          |                |                |                |
| 0.000             | 0.000          | 1.000          | 0.092          | 0.896          | 0.012          |                |                |                |
| $u(w_1)=0.001$    | $u(w_2)=0.001$ | $u(w_3)=0.001$ | $u(w_1)=0.001$ | $u(w_2)=0.001$ | $u(w_3)=0.001$ |                |                |                |
| Triphasic region  |                |                |                |                |                |                |                |                |
| Upper Phase       |                |                | Medium Phase   |                |                | Lower phase    |                |                |
| $w_1$             | $w_2$          | $w_3$          | $w_1$          | $w_2$          | $w_3$          | $w_1$          | $w_2$          | $w_3$          |
| 0.000             | 0.000          | 1.000          | 0.972          | 0.028          | 0.000          | 0.174          | 0.817          | 0.009          |
| 0.000             | 0.000          | 1.000          | 0.972          | 0.028          | 0.000          | 0.174          | 0.817          | 0.009          |
| $u(w_1)=0.001$    | $u(w_2)=0.001$ | $u(w_3)=0.001$ | $u(w_1)=0.003$ | $u(w_2)=0.003$ | $u(w_3)=0.001$ | $u(w_1)=0.001$ | $u(w_2)=0.001$ | $u(w_3)=0.001$ |

$u(P) = 5$  kPa,  $u(T) = 0.05$  K. All the uncertainties are standard.

Table S2. Liquid-liquid equilibrium of the ternary system water (1) + [C<sub>6</sub>C<sub>1</sub>py][OTf] (2) + *n*-octane (3) at 323.15 K and 0.1 MPa.

| Biphasic region 1 |                |                |                |                |                |                |                |                |
|-------------------|----------------|----------------|----------------|----------------|----------------|----------------|----------------|----------------|
| Upper Phase       |                |                | Lower phase    |                |                |                |                |                |
| $w_1$             | $w_2$          | $w_3$          | $w_1$          | $w_2$          | $w_3$          |                |                |                |
| 0.000             | 0.000          | 1.000          | 1.000          | 0.000          | 0.000          |                |                |                |
| 0.000             | 0.000          | 1.000          | 0.975          | 0.025          | 0.000          |                |                |                |
| $u(w_1)=0.001$    | $u(w_2)=0.001$ | $u(w_3)=0.001$ | $u(w_1)=0.003$ | $u(w_2)=0.003$ | $u(w_3)=0.001$ |                |                |                |
| Biphasic region 2 |                |                |                |                |                |                |                |                |
| Upper Phase       |                |                | Lower phase    |                |                |                |                |                |
| $w_1$             | $w_2$          | $w_3$          | $w_1$          | $w_2$          | $w_3$          |                |                |                |
| 0.965             | 0.035          | 0.000          | 0.210          | 0.790          | 0.000          |                |                |                |
| 0.965             | 0.035          | 0.000          | 0.210          | 0.790          | 0.000          |                |                |                |
| $u(w_1)=0.003$    | $u(w_2)=0.003$ | $u(w_3)=0.001$ | $u(w_1)=0.003$ | $u(w_2)=0.003$ | $u(w_3)=0.001$ |                |                |                |
| Biphasic region 3 |                |                |                |                |                |                |                |                |
| Upper Phase       |                |                | Lower phase    |                |                |                |                |                |
| $w_1$             | $w_2$          | $w_3$          | $w_1$          | $w_2$          | $w_3$          |                |                |                |
| 0.000             | 0.000          | 1.000          | 0.177          | 0.814          | 0.009          |                |                |                |
| 0.000             | 0.000          | 1.000          | 0.127          | 0.862          | 0.011          |                |                |                |
| 0.000             | 0.000          | 1.000          | 0.060          | 0.922          | 0.019          |                |                |                |
| 0.000             | 0.000          | 1.000          | 0.021          | 0.958          | 0.020          |                |                |                |
| $u(w_1)=0.001$    | $u(w_2)=0.001$ | $u(w_3)=0.001$ | $u(w_1)=0.001$ | $u(w_2)=0.001$ | $u(w_3)=0.001$ |                |                |                |
| Triphasic region  |                |                |                |                |                |                |                |                |
| Upper Phase       |                |                | Medium Phase   |                |                | Lower phase    |                |                |
| $w_1$             | $w_2$          | $w_3$          | $w_1$          | $w_2$          | $w_3$          | $w_1$          | $w_2$          | $w_3$          |
| 0.000             | 0.000          | 1.000          | 0.965          | 0.035          | 0.000          | 0.203          | 0.788          | 0.009          |
| 0.000             | 0.000          | 1.000          | 0.965          | 0.035          | 0.000          | 0.203          | 0.788          | 0.009          |
| $u(w_1)=0.001$    | $u(w_2)=0.001$ | $u(w_3)=0.001$ | $u(w_1)=0.003$ | $u(w_2)=0.003$ | $u(w_3)=0.001$ | $u(w_1)=0.001$ | $u(w_2)=0.001$ | $u(w_3)=0.001$ |

$u(P) = 5$  kPa,  $u(T) = 0.05$  K. All the uncertainties are standard.

Table S3. Liquid-liquid equilibrium of the ternary system water (1) + [C<sub>6</sub>C<sub>1</sub>py][OTf] (2) + toluene (3) at 298.15 K and 0.1 MPa.

| Biphasic region 1 |                |                |                |                |                |                |                |                |
|-------------------|----------------|----------------|----------------|----------------|----------------|----------------|----------------|----------------|
| Upper Phase       |                |                | Lower phase    |                |                |                |                |                |
| $w_1$             | $w_2$          | $w_3$          | $w_1$          | $w_2$          | $w_3$          |                |                |                |
| 0.000             | 0.000          | 1.000          | 1.000          | 0.000          | 0.000          |                |                |                |
| 0.000             | 0.000          | 1.000          | 0.985          | 0.015          | 0.000          |                |                |                |
| $u(w_1)=0.001$    | $u(w_2)=0.001$ | $u(w_3)=0.001$ | $u(w_1)=0.003$ | $u(w_2)=0.003$ | $u(w_3)=0.001$ |                |                |                |
| Biphasic region 2 |                |                |                |                |                |                |                |                |
| Upper Phase       |                |                | Lower phase    |                |                |                |                |                |
| $w_1$             | $w_2$          | $w_3$          | $w_1$          | $w_2$          | $w_3$          |                |                |                |
| 0.972             | 0.028          | 0.000          | 0.179          | 0.821          | 0.000          |                |                |                |
| 0.972             | 0.028          | 0.000          | 0.107          | 0.787          | 0.106          |                |                |                |
| 0.972             | 0.028          | 0.000          | 0.078          | 0.741          | 0.182          |                |                |                |
| 0.972             | 0.028          | 0.000          | 0.055          | 0.676          | 0.270          |                |                |                |
| $u(w_1)=0.003$    | $u(w_2)=0.003$ | $u(w_3)=0.001$ | $u(w_1)=0.003$ | $u(w_2)=0.003$ | $u(w_3)=0.001$ |                |                |                |
| Biphasic region 3 |                |                |                |                |                |                |                |                |
| Upper Phase       |                |                | Lower phase    |                |                |                |                |                |
| $w_1$             | $w_2$          | $w_3$          | $w_1$          | $w_2$          | $w_3$          |                |                |                |
| 0.000             | 0.000          | 1.000          | 0.000          | 0.550          | 0.450          |                |                |                |
| 0.000             | 0.000          | 1.000          | 0.022          | 0.603          | 0.376          |                |                |                |
| 0.000             | 0.000          | 1.000          | 0.032          | 0.617          | 0.351          |                |                |                |
| 0.000             | 0.000          | 1.000          | 0.042          | 0.627          | 0.331          |                |                |                |
| $u(w_1)=0.001$    | $u(w_2)=0.001$ | $u(w_3)=0.001$ | $u(w_1)=0.001$ | $u(w_2)=0.001$ | $u(w_3)=0.001$ |                |                |                |
| Triphasic region  |                |                |                |                |                |                |                |                |
| Upper Phase       |                |                | Medium Phase   |                |                | Lower phase    |                |                |
| $w_1$             | $w_2$          | $w_3$          | $w_1$          | $w_2$          | $w_3$          | $w_1$          | $w_2$          | $w_3$          |
| 0.000             | 0.000          | 1.000          | 0.972          | 0.028          | 0.000          | 0.056          | 0.639          | 0.305          |
| $u(w_1)=0.001$    | $u(w_2)=0.001$ | $u(w_3)=0.001$ | $u(w_1)=0.003$ | $u(w_2)=0.003$ | $u(w_3)=0.001$ | $u(w_1)=0.001$ | $u(w_2)=0.001$ | $u(w_3)=0.001$ |

$u(P) = 5$  kPa,  $u(T) = 0.05$  K. All the uncertainties are standard.

Table S4. Liquid-liquid equilibrium of the ternary system water (1) + [C<sub>6</sub>C<sub>1</sub>py][OTf] (2) + toluene (3) at 323.15 K and 0.1 MPa

| Biphasic region 1 |                |                |                |                |                |                |                |                |
|-------------------|----------------|----------------|----------------|----------------|----------------|----------------|----------------|----------------|
| Upper Phase       |                |                | Lower phase    |                |                |                |                |                |
| $w_1$             | $w_2$          | $w_3$          | $w_1$          | $w_2$          | $w_3$          |                |                |                |
| 0.000             | 0.000          | 1.000          | 1.000          | 0.000          | 0.000          |                |                |                |
| 0.000             | 0.000          | 1.000          | 0.983          | 0.017          | 0.000          |                |                |                |
| $u(w_1)=0.001$    | $u(w_2)=0.001$ | $u(w_3)=0.001$ | $u(w_1)=0.003$ | $u(w_2)=0.003$ | $u(w_3)=0.001$ |                |                |                |
| Biphasic region 2 |                |                |                |                |                |                |                |                |
| Upper Phase       |                |                | Lower phase    |                |                |                |                |                |
| $w_1$             | $w_2$          | $w_3$          | $w_1$          | $w_2$          | $w_3$          |                |                |                |
| 0.965             | 0.035          | 0.000          | 0.210          | 0.790          | 0.000          |                |                |                |
| 0.965             | 0.035          | 0.000          | 0.140          | 0.787          | 0.073          |                |                |                |
| 0.965             | 0.035          | 0.000          | 0.113          | 0.767          | 0.119          |                |                |                |
| 0.965             | 0.035          | 0.000          | 0.097          | 0.749          | 0.154          |                |                |                |
| 0.965             | 0.035          | 0.000          | 0.072          | 0.687          | 0.241          |                |                |                |
| $u(w_1)=0.003$    | $u(w_2)=0.003$ | $u(w_3)=0.001$ | $u(w_1)=0.003$ | $u(w_2)=0.003$ | $u(w_3)=0.001$ |                |                |                |
| Biphasic region 3 |                |                |                |                |                |                |                |                |
| Upper Phase       |                |                | Lower phase    |                |                |                |                |                |
| $w_1$             | $w_2$          | $w_3$          | $w_1$          | $w_2$          | $w_3$          |                |                |                |
| 0.000             | 0.000          | 1.000          | 0.000          | 0.559          | 0.441          |                |                |                |
| 0.000             | 0.000          | 1.000          | 0.012          | 0.584          | 0.404          |                |                |                |
| 0.000             | 0.000          | 1.000          | 0.024          | 0.612          | 0.364          |                |                |                |
| 0.000             | 0.000          | 1.000          | 0.031          | 0.623          | 0.346          |                |                |                |
| $u(w_1)=0.001$    | $u(w_2)=0.001$ | $u(w_3)=0.001$ | $u(w_1)=0.001$ | $u(w_2)=0.001$ | $u(w_3)=0.001$ |                |                |                |
| Triphasic region  |                |                |                |                |                |                |                |                |
| Upper Phase       |                |                | Medium Phase   |                |                | Lower phase    |                |                |
| $w_1$             | $w_2$          | $w_3$          | $w_1$          | $w_2$          | $w_3$          | $w_1$          | $w_2$          | $w_3$          |
| 0.000             | 0.000          | 1.000          | 0.965          | 0.035          | 0.000          | 0.072          | 0.649          | 0.279          |
| $u(w_1)=0.001$    | $u(w_2)=0.001$ | $u(w_3)=0.001$ | $u(w_1)=0.003$ | $u(w_2)=0.003$ | $u(w_3)=0.001$ | $u(w_1)=0.001$ | $u(w_2)=0.001$ | $u(w_3)=0.001$ |

$u(P) = 5$  kPa,  $u(T) = 0.05$  K. All the uncertainties are standard.

Table S5. Solid-liquid equilibrium of the ternary system water (1) + [C<sub>6</sub>C<sub>1</sub>py][OTf] (2) + toluene (3) at several temperatures and 0.1 MPa.

| Liquid Phase (298.15 K) |                |                | Liquid phase (323.15K) |                |                |
|-------------------------|----------------|----------------|------------------------|----------------|----------------|
| $w_1$                   | $w_2$          | $w_3$          | $w_1$                  | $w_2$          | $w_3$          |
| 0.112                   | 0.888          | 0.000          | 0.033                  | 0.967          | 0.000          |
| 0.055                   | 0.878          | 0.067          | 0.023                  | 0.967          | 0.010          |
| 0.022                   | 0.809          | 0.169          | 0.010                  | 0.932          | 0.058          |
| 0.000                   | 0.641          | 0.359          | 0.000                  | 0.896          | 0.104          |
| $u(w_1)=0.002$          | $u(w_2)=0.002$ | $u(w_3)=0.001$ | $u(w_1)=0.001$         | $u(w_2)=0.001$ | $u(w_3)=0.001$ |

$u(P) = 5$  kPa,  $u(T) = 0.05$  K. All the uncertainties are standard.

Table S6. Liquid-liquid equilibrium of the ternary system water (1) + [C<sub>6</sub>C<sub>1</sub>py][OTf] (2) + cyclohexane (3) at 298.15 K and 0.1 MPa.

| Biphasic region 1 |                |                |                |                |                |                |                |                |
|-------------------|----------------|----------------|----------------|----------------|----------------|----------------|----------------|----------------|
| Upper Phase       |                |                | Lower phase    |                |                |                |                |                |
| $w_1$             | $w_2$          | $w_3$          | $w_1$          | $w_2$          | $w_3$          |                |                |                |
| 0.000             | 0.000          | 1.000          | 1.000          | 0.000          | 0.000          |                |                |                |
| 0.000             | 0.000          | 1.000          | 0.981          | 0.019          | 0.000          |                |                |                |
| $u(w_1)=0.001$    | $u(w_2)=0.001$ | $u(w_3)=0.001$ | $u(w_1)=0.003$ | $u(w_2)=0.003$ | $u(w_3)=0.001$ |                |                |                |
| Biphasic region 2 |                |                |                |                |                |                |                |                |
| Upper Phase       |                |                | Lower phase    |                |                |                |                |                |
| $w_1$             | $w_2$          | $w_3$          | $w_1$          | $w_2$          | $w_3$          |                |                |                |
| 0.972             | 0.028          | 0.000          | 0.179          | 0.821          | 0.000          |                |                |                |
| $u(w_1)=0.003$    | $u(w_2)=0.003$ | $u(w_3)=0.001$ | $u(w_1)=0.003$ | $u(w_2)=0.003$ | $u(w_3)=0.001$ |                |                |                |
| Biphasic region 3 |                |                |                |                |                |                |                |                |
| Upper Phase       |                |                | Lower phase    |                |                |                |                |                |
| $w_1$             | $w_2$          | $w_3$          | $w_1$          | $w_2$          | $w_3$          |                |                |                |
| 0.000             | 0.000          | 1.000          | 0.159          | 0.818          | 0.024          |                |                |                |
| 0.000             | 0.000          | 1.000          | 0.124          | 0.846          | 0.030          |                |                |                |
| 0.000             | 0.000          | 1.000          | 0.088          | 0.879          | 0.033          |                |                |                |
| $u(w_1)=0.001$    | $u(w_2)=0.001$ | $u(w_3)=0.001$ | $u(w_1)=0.002$ | $u(w_2)=0.002$ | $u(w_3)=0.001$ |                |                |                |
| Triphasic region  |                |                |                |                |                |                |                |                |
| Upper Phase       |                |                | Medium Phase   |                |                | Lower phase    |                |                |
| $w_1$             | $w_2$          | $w_3$          | $w_1$          | $w_2$          | $w_3$          | $w_1$          | $w_2$          | $w_3$          |
| 0.000             | 0.000          | 1.000          | 0.972          | 0.028          | 0.000          | 0.170          | 0.803          | 0.027          |
| $u(w_1)=0.001$    | $u(w_2)=0.001$ | $u(w_3)=0.001$ | $u(w_1)=0.003$ | $u(w_2)=0.003$ | $u(w_3)=0.001$ | $u(w_1)=0.002$ | $u(w_2)=0.002$ | $u(w_3)=0.001$ |

$u(P) = 5$  kPa,  $u(T) = 0.05$  K. All the uncertainties are standard.

Table S7. Liquid-liquid equilibrium of the ternary system water (1) + [C<sub>6</sub>C<sub>1</sub>py][OTf] (2) + cyclohexane (3) at 323.15 K and 0.1 MPa.

| Biphasic region 1 |                |                |                |                |                |                |                |                |
|-------------------|----------------|----------------|----------------|----------------|----------------|----------------|----------------|----------------|
| Upper Phase       |                |                | Lower phase    |                |                |                |                |                |
| $w_1$             | $w_2$          | $w_3$          | $w_1$          | $w_2$          | $w_3$          |                |                |                |
| 0.000             | 0.000          | 1.000          | 1.000          | 0.000          | 0.000          |                |                |                |
| 0.000             | 0.000          | 1.000          | 0.979          | 0.021          | 0.000          |                |                |                |
| $u(w_1)=0.001$    | $u(w_2)=0.001$ | $u(w_3)=0.001$ | $u(w_1)=0.003$ | $u(w_2)=0.003$ | $u(w_3)=0.001$ |                |                |                |
| Biphasic region 2 |                |                |                |                |                |                |                |                |
| Upper Phase       |                |                | Lower phase    |                |                |                |                |                |
| $w_1$             | $w_2$          | $w_3$          | $w_1$          | $w_2$          | $w_3$          |                |                |                |
| 0.965             | 0.035          | 0.000          | 0.210          | 0.790          | 0.000          |                |                |                |
| $u(w_1)=0.003$    | $u(w_2)=0.003$ | $u(w_3)=0.001$ | $u(w_1)=0.003$ | $u(w_2)=0.003$ | $u(w_3)=0.001$ |                |                |                |
| Biphasic region 3 |                |                |                |                |                |                |                |                |
| Upper Phase       |                |                | Lower phase    |                |                |                |                |                |
| $w_1$             | $w_2$          | $w_3$          | $w_1$          | $w_2$          | $w_3$          |                |                |                |
| 0.000             | 0.000          | 1.000          | 0.151          | 0.820          | 0.029          |                |                |                |
| 0.000             | 0.000          | 1.000          | 0.116          | 0.853          | 0.032          |                |                |                |
| 0.000             | 0.000          | 1.000          | 0.090          | 0.874          | 0.036          |                |                |                |
| 0.000             | 0.000          | 1.000          | 0.071          | 0.890          | 0.039          |                |                |                |
| 0.000             | 0.000          | 1.000          | 0.042          | 0.915          | 0.043          |                |                |                |
| $u(w_1)=0.001$    | $u(w_2)=0.001$ | $u(w_3)=0.001$ | $u(w_1)=0.002$ | $u(w_2)=0.002$ | $u(w_3)=0.001$ |                |                |                |
| Triphasic region  |                |                |                |                |                |                |                |                |
| Upper Phase       |                |                | Medium Phase   |                |                | Lower phase    |                |                |
| $w_1$             | $w_2$          | $w_3$          | $w_1$          | $w_2$          | $w_3$          | $w_1$          | $w_2$          | $w_3$          |
| 0.000             | 0.000          | 1.000          | 0.965          | 0.035          | 0.000          | 0.164          | 0.809          | 0.027          |
| $u(w_1)=0.001$    | $u(w_2)=0.001$ | $u(w_3)=0.001$ | $u(w_1)=0.003$ | $u(w_2)=0.003$ | $u(w_3)=0.001$ | $u(w_1)=0.002$ | $u(w_2)=0.002$ | $u(w_3)=0.001$ |

$u(P) = 5$  kPa,  $u(T) = 0.05$  K. All the uncertainties are standard.
